# Supplementary material
Source: publisher site journal article supplement (https://www.spandidos-publications.com/1216/downloadSupplementary)
Supplement: Supplementary file 1 [file downloadSupplementary]

Table SI. ZFPM2 and ZFPM2-AS1 associated genes.

| Gene         | Function                                          | Entrez gene ID |
|--------------|---------------------------------------------------|----------------|
| ZFPM2-AS1    | ZFPM2 antisense RNA 1                             | 102723356      |
| ZFPM2        | Zinc finger protein: FOG family member 2          | 23414          |
| DUXAP10      | Double homeobox A pseudogene 10                   | 503639         |
| DUXAP8       | Double homeobox A pseudogene 8                    | 503637         |
| LOC105369844 | Uncharacterized LOC105369844                      | 105369844      |
| LINC02434    | Long intergenic non-protein coding RNA 2434       | 105377606      |
| LOC107985638 | Uncharacterized LOC107985638                      | 107985638      |
| MAGEC2       | MAGE family member C2                             | 51438          |
| LOC100507377 | Uncharacterized LOC100507377                      | 100507377      |
| SRPX2        | Sushi repeat containing protein: X-linked 2       | 27286          |
| MAGEA3       | MAGE family member A3                             | 4102           |
| LOC105375631 | Uncharacterized LOC105375631                      | 105375631      |
| LOC102724542 | Uncharacterized LOC102724542                      | 102724542      |
| MAGEA6       | MAGE family member A6                             | 4105           |
| LINC02454    | Long intergenic non-protein coding RNA 2454       | 105369807      |
| LINC02241    | Long intergenic non-protein coding RNA 2241       | 105374676      |
| LOC107986840 | Uncharacterized LOC107986840                      | 107986840      |
| BMS1P22      | BMS1: Ribosome biogenesis factor pseudogene 22    | 106480334      |
| LINC02475    | Long intergenic non-protein coding RNA 2475       | 100506827      |
| LINC01518    | Long intergenic non-protein coding RNA 1518       | 101929397      |
| TM4SF19      | Transmembrane 4 L six family member 19            | 116211         |
| MAGEA12      | MAGE family member A12                            | 4111           |
| LINC02081    | Long intergenic non-protein coding RNA 2081       | 101928710      |
| LINC01583    | Long intergenic non-protein coding RNA 1583       | 101929690      |
| LINC02105    | Long intergenic non-protein coding RNA 2105       | 105378966      |
| LOC102723663 | Uncharacterized LOC102723663                      | 102723663      |
| OR51B5       | Olfactory receptor family 51 subfamily B member 5 | 282763         |
| LOC102724434 | Uncharacterized LOC102724434                      | 102724434      |
| LOC105370956 | Uncharacterized LOC105370956                      | 105370956      |
| MAGEB2       | MAGE family member B2                             | 4113           |
| LINC00346    | Long intergenic non-protein coding RNA 346        | 283487         |
| SSX1         | SSX family member 1                               | 6756           |
| CSAG1        | Chondrosarcoma associated gene 1                  | 158511         |
| LOC283028    | Uncharacterized LOC283028                         | 283028         |
| LOC107986973 | Uncharacterized LOC107986973                      | 107986973      |
| LINC01060    | Long intergenic non-protein coding RNA 1060       | 401164         |
| LOC100128317 | Uncharacterized LOC100128317                      | 100128317      |
| LINC00460    | Long intergenic non-protein coding RNA 460        | 728192         |
| LOC105371070 | Uncharacterized LOC105371070                      | 105371070      |
| LOC102723724 | Uncharacterized LOC102723724                      | 102723724      |
| MAGEC1       | MAGE family member C1                             | 9947           |
| LURAPIL-AS1  | LURAPIL antisense RNA 1                           | 101929467      |
| LINC01615    | Long intergenic non-protein coding RNA 1615       | 101929484      |
| LOC100508631 | Uncharacterized LOC100508631                      | 100508631      |
| LOC105374003 | Uncharacterized LOC105374003                      | 105374003      |
| LOC105378929 | Uncharacterized LOC105378929                      | 105378929      |
| CD163L1      | CD163 molecule like 1                             | 283316         |
| SHOX2        | Short stature homeobox 2                          | 6474           |
| LOC107986558 | Uncharacterized LOC107986558                      | 107986558      |
| OR51B4       | Olfactory receptor family 51 subfamily B member 4 | 79339          |
| LINC02104    | Long intergenic non-protein coding RNA 2104       | 101926940      |
| EYA4         | EYA transcriptional coactivator and phosphatase 4 | 2070           |
| CT83         | Cancer/testis antigen 83                          | 203413         |
| LOC105371990 | Uncharacterized LOC105371990                      | 105371990      |
| LOC400655    | Uncharacterized LOC400655                         | 400655         |
| LOC730338    | Uncharacterized LOC730338                         | 730338         |

Table SI. Continued.

| Gene         | Function                                                                 | Entrez gene ID |
|--------------|--------------------------------------------------------------------------|----------------|
| ADGRD1-AS1   | ADGRD1 antisense RNA 1                                                   | 105755954      |
| KCNMB2-AS1   | KCNMB2 antisense RNA 1                                                   | 104797538      |
| LOC107985134 | Uncharacterized LOC107985134                                             | 107985134      |
| LOC107985054 | Uncharacterized LOC107985054                                             | 107985054      |
| LINC01419    | Long intergenic non-protein coding RNA 1419                              | 103352670      |
| ULBP2        | UL16 binding protein 2                                                   | 80328          |
| GNGT1        | G protein subunit gamma transducin 1                                     | 2792           |
| LOC107986334 | Uncharacterized LOC107986334                                             | 107986334      |
| LOC107987110 | Uncharacterized LOC107987110                                             | 107987110      |
| LOC105374715 | Uncharacterized LOC105374715                                             | 105374715      |
| LOC105373349 | Uncharacterized LOC105373349                                             | 105373349      |
| LOC101927040 | Uncharacterized LOC101927040                                             | 101927040      |
| MAGEA1       | MAGE family member A1                                                    | 4100           |
| TMEM132D-AS1 | TMEM132D antisense RNA 1                                                 | 283352         |
| LOC105369827 | Uncharacterized LOC105369827                                             | 105369827      |
| LOC101927417 | Uncharacterized LOC101927417                                             | 101927417      |
| AHCTF1P1     | AT-hook containing transcription factor 1 pseudogene 1                   | 285116         |
| ME1          | Malic enzyme 1                                                           | 4199           |
| LINC0002     | Uncharacterized LincR-0002                                               | 103344926      |
| LOC100506474 | Uncharacterized LOC100506474                                             | 100506474      |
| LOC105376236 | Uncharacterized LOC105376236                                             | 105376236      |
| LOC100507065 | Uncharacterized LOC100507065                                             | 100507065      |
| RPLP0P2      | Ribosomal protein lateral stalk subunit P0 pseudogene 2                  | 113157         |
| LINC00355    | Long intergenic non-protein coding RNA 355                               | 144766         |
| POPDC3       | Popeye domain containing 3                                               | 64208          |
| LOC151760    | Putative uncharacterized protein LOC151760                               | 151760         |
| LOC107986198 | Uncharacterized LOC107986198                                             | 107986198      |
| MMP13        | Matrix metalloproteinase 13                                              | 4322           |
| LOC644135    | Uncharacterized LOC644135                                                | 644135         |
| COX7B2       | Cytochrome c oxidase subunit 7B2                                         | 170712         |
| LOC105371967 | Uncharacterized LOC105371967                                             | 105371967      |
| TLR6         | Toll like receptor 6                                                     | 10333          |
| OSMR         | Oncostatin M receptor                                                    | 9180           |
| NMRAL2P      | NmrA like redox sensor 2: pseudogene                                     | 344887         |
| LINC01711    | Long intergenic non-protein coding RNA 1711                              | 79160          |
| LOC105371453 | Uncharacterized LOC105371453                                             | 105371453      |
| LINC02407    | Long intergenic non-protein coding RNA 2407                              | 105369848      |
| LOC107984684 | Uncharacterized LOC107984684                                             | 107984684      |
| NFE4         | Nuclear factor: erythroid 4                                              | 58160          |
| LOC107984132 | Uncharacterized LOC107984132                                             | 107984132      |
| PPDPFL       | Pancreatic progenitor cell differentiation and proliferation factor like | 492307         |
| COL12A1      | Collagen type XII alpha 1 chain                                          | 1303           |
| LOC105379417 | Ankyrin repeat domain-containing protein 20A2-like                       | 105379417      |
| LOC105379562 | Uncharacterized LOC105379562                                             | 105379562      |
| LOC107986606 | Uncharacterized LOC107986606                                             | 107986606      |
| FAP          | Fibroblast activation protein alpha                                      | 2191           |
| LVRN         | Laeverin                                                                 | 206338         |
| LOC105375816 | Putative coiled-coil domain-containing protein 144C                      | 105375816      |
| LOC101929532 | Uncharacterized LOC101929532                                             | 101929532      |
| ACTBL2       | Actin: beta like 2                                                       | 345651         |
| LOC107985004 | Uncharacterized LOC107985004                                             | 107985004      |
| LOC100421746 | PAGE family member 5 pseudogene                                          | 100421746      |
| LOC102723847 | Uncharacterized LOC102723847                                             | 102723847      |
| HRH1         | Histamine receptor H1                                                    | 3269           |
| NR2F1-AS1    | NR2F1 antisense RNA 1                                                    | 441094         |
| FAT1         | FAT atypical cadherin 1                                                  | 2195           |

Table SI. Continued.

| Gene         | Function                                                   | Entrez gene ID |
|--------------|------------------------------------------------------------|----------------|
| LINC02212    | Long intergenic non-protein coding RNA 2212                | 101929412      |
| LOC101927888 | Uncharacterized LOC101927888                               | 101927888      |
| LOC102723834 | Uncharacterized LOC102723834                               | 102723834      |
| MKRN3        | Makorin ring finger protein 3                              | 7681           |
| LOC650226    | Ankyrin repeat domain 26 pseudogene                        | 650226         |
| LOC101927263 | Uncharacterized LOC101927263                               | 101927263      |
| LOC101929028 | Uncharacterized LOC101929028                               | 101929028      |
| TPTE         | Transmembrane phosphatase with tensin homology             | 7179           |
| TEX41        | Testis expressed 41 (non-protein coding)                   | 401014         |
| NAA11        | N(alpha)-acetyltransferase 11: NatA catalytic subunit      | 84779          |
| ASNSP1       | Asparagine synthetase pseudogene 1                         | 389652         |
| LINC02331    | Long intergenic non-protein coding RNA 2331                | 105370503      |
| LINC01111    | Long intergenic non-protein coding RNA 1111                | 101926978      |
| LINC01029    | Long intergenic non-protein coding RNA 1029                | 101927715      |
| GCNT3        | Glucosaminyl (N-acetyl) transferase 3: mucin type          | 9245           |
| LOC101928446 | Uncharacterized LOC101928446                               | 101928446      |
| DLGAP1-AS2   | DLGAP1 antisense RNA 2                                     | 84777          |
| IL13RA2      | Interleukin 13 receptor subunit alpha 2                    | 3598           |
| SPRY4-AS1    | SPRY4 antisense RNA 1                                      | 101926941      |
| SELENOOLP    | Selenoprotein O like: pseudogene                           | 105376462      |
| LOC105371703 | Uncharacterized LOC105371703                               | 105371703      |
| LOC102724983 | Uncharacterized LOC102724983                               | 102724983      |
| SLC44A5      | Solute carrier family 44 member 5                          | 204962         |
| LINC02274    | Long intergenic non-protein coding RNA 2274                | 100506498      |
| LINC01287    | Long intergenic non-protein coding RNA 1287                | 103724390      |
| FRG1JP       | FSHD region gene 1 family member J: pseudogene             | 642236         |
| MARCOL       | MARCO like                                                 | 105378220      |
| SPANXB1      | SPANX family member B1                                     | 728695         |
| CNTN5        | Contactin 5                                                | 53942          |
| LOC105376939 | Uncharacterized LOC105376939                               | 105376939      |
| SLCO1B3      | Solute carrier organic anion transporter family member 1B3 | 28234          |
| BBOX1-AS1    | BBOX1 antisense RNA 1                                      | 103695435      |
| LINC00887    | Long intergenic non-protein coding RNA 887                 | 100131551      |
| LINC01094    | Long intergenic non-protein coding RNA 1094                | 100505702      |
| CCNYL2       | Cyclin Y-like 2 (pseudogene)                               | 414194         |
| LOC107986951 | Uncharacterized LOC107986951                               | 107986951      |
| LOC105378482 | Uncharacterized LOC105378482                               | 105378482      |
| CASC9        | Cancer susceptibility 9 (non-protein coding)               | 101805492      |
| LOC105370353 | Uncharacterized LOC105370353                               | 105370353      |
| FZD6         | Frizzled class receptor 6                                  | 8323           |
| OXR1         | Oxidation resistance 1                                     | 55074          |
| LOC102723546 | Uncharacterized LOC102723546                               | 102723546      |
| MAGEA10      | MAGE family member A10                                     | 4109           |
| DPY19L1P2    | DPY19L1 pseudogene 2                                       | 102724668      |
| LINC01297    | Long intergenic non-protein coding RNA 1297                | 106146148      |
| LINC01446    | Long intergenic non-protein coding RNA 1446                | 401337         |
| HOXD8        | Homeobox D8                                                | 3234           |
| LOC105378088 | Uncharacterized LOC105378088                               | 105378088      |
| LOC105370064 | Uncharacterized LOC105370064                               | 105370064      |
| CD109        | CD109 molecule                                             | 135228         |
| LINC00491    | Long intergenic non-protein coding RNA 491                 | 285708         |
| LOC107987366 | Uncharacterized LOC107987366                               | 107987366      |
| LOC105373137 | Uncharacterized LOC105373137                               | 105373137      |
| APCDD1L-AS1  | APCDD1L antisense RNA 1 (head to head)                     | 149773         |
| LOC284930    | Uncharacterized LOC284930                                  | 284930         |
| CARD6        | Caspase recruitment domain family member 6                 | 84674          |

Table SI. Continued.

| Gene         | Function                                                       | Entrez gene ID |
|--------------|----------------------------------------------------------------|----------------|
| FBXL13       | F-box and leucine rich repeat protein 13                       | 222235         |
| GULP1        | GULP: Engulfment adaptor PTB domain containing 1               | 51454          |
| SMPX         | Small muscle protein: X-linked                                 | 23676          |
| LNC SRLR     | lncRNA sorafenib resistance in renal cell carcinoma associated | 109729161      |
| LOC105373369 | Uncharacterized LOC105373369                                   | 105373369      |
| FKBP9P1      | FK506 binding protein 9 pseudogene 1                           | 360132         |
| LOC105377845 | Uncharacterized LOC105377845                                   | 105377845      |
| PTH LH       | Parathyroid hormone like hormone                               | 5744           |
| ZNRF3-AS1    | ZNRF3 antisense RNA 1                                          | 100874123      |
| LINC01929    | Long intergenic non-protein coding RNA 1929                    | 101927229      |
| LINC01411    | Long intergenic non-protein coding RNA 1411                    | 101928176      |
| ZMIZ1-AS1    | ZMIZ1 antisense RNA 1                                          | 283050         |
| BLID         | BH3-like motif containing: cell death inducer                  | 414899         |
| LOC101927136 | Uncharacterized LOC101927136                                   | 101927136      |
| LOC107985229 | Uncharacterized LOC107985229                                   | 107985229      |
| LOC101929128 | Uncharacterized LOC101929128                                   | 101929128      |
| CNGB3        | Cyclic nucleotide gated channel beta 3                         | 54714          |
| SPP1         | Secreted phosphoprotein 1                                      | 6696           |
| AACSP1       | Acetoacetyl-CoA synthetase pseudogene 1                        | 729522         |
| THBS2        | Thrombospondin 2                                               | 7058           |
| LOC105377508 | Uncharacterized LOC105377508                                   | 105377508      |
| PPFIA2       | PTPRF interacting protein alpha 2                              | 8499           |
| LOC101927356 | Uncharacterized LOC101927356                                   | 101927356      |
| LOC105376369 | Uncharacterized LOC105376369                                   | 105376369      |
| HTATSF1P2    | HIV-1 Tat specific factor 1 pseudogene 2                       | 401233         |
| PHTF1        | Putative homeodomain transcription factor 1                    | 10745          |
| LOC102723591 | Uncharacterized LOC102723591                                   | 102723591      |
| ARL14EPL     | ADP ribosylation factor like GTPase 14 effector protein like   | 644100         |
| IL31RA       | Interleukin 31 receptor A                                      | 133396         |
| PDE10A       | Phosphodiesterase 10A                                          | 10846          |
| TBX15        | T-box 15                                                       | 6913           |
| LOC107984551 | Uncharacterized LOC107984551                                   | 107984551      |
| CFI          | Complement factor I                                            | 3426           |

ZFPM2-AS1, zinc finger protein, FOG family member 2; AS1, antisense RNA 1.
